# Supplementary material for: Design, Synthesis, and Evaluation of Amphiphilic Cyclic and Linear Peptides Composed of Hydrophobic and Positively-Charged Amino Acids as Antibacterial Agents
Source: PubMed Central journal article supplement (PMC6222377; doi:10.3390/molecules23102722), 2018-10-22

## Supplementary information

# Design, Synthesis, and Evaluation of Amphiphilic Cyclic and Linear Peptides Composed of Hydrophobic and Positively Charged Amino Acids As Antibacterial Agents

Neda Riahifard <sup>1</sup>, Saghar Mozaffari,<sup>1</sup> Taibah Aldakhil,<sup>1</sup> Francisco Nunez,<sup>1</sup> Qamar Alshmmari,<sup>1</sup> Saud Alshammari,<sup>1</sup> Jason Yamaki <sup>2</sup>, Keykavous Parang <sup>1,\*</sup> and Rakesh Kumar Tiwari <sup>1,\*</sup>

<sup>1</sup> Center for Targeted Drug Delivery, Department of Biomedical and Pharmaceutical Sciences, Chapman University School of Pharmacy, Harry and Diane Rinker Health Science Campus, Irvine, CA 92618, USA; riah103@mail.chapman.edu (N.R.); mozaf100@mail.chapman.edu; aldak100@mail.chapman.edu; nunez138@mail.chapman.edu; qalshammari@chapman.edu; alshammari@chapman.edu

<sup>2</sup> Department of Pharmacy Practice, Chapman University School of Pharmacy, Harry and Diane Rinker Health Science Campus, Irvine, CA 92618, USA; yamaki@chapman.edu

\* Correspondence: parang@chapman.edu (K.P.); tiwari@chapman.edu (R.T.); Tel.: +1-714-516-5483 (R.T.); +1-714-516-5489 (K.P.)

# Mass spectroscopy data of selected synthesized compounds:

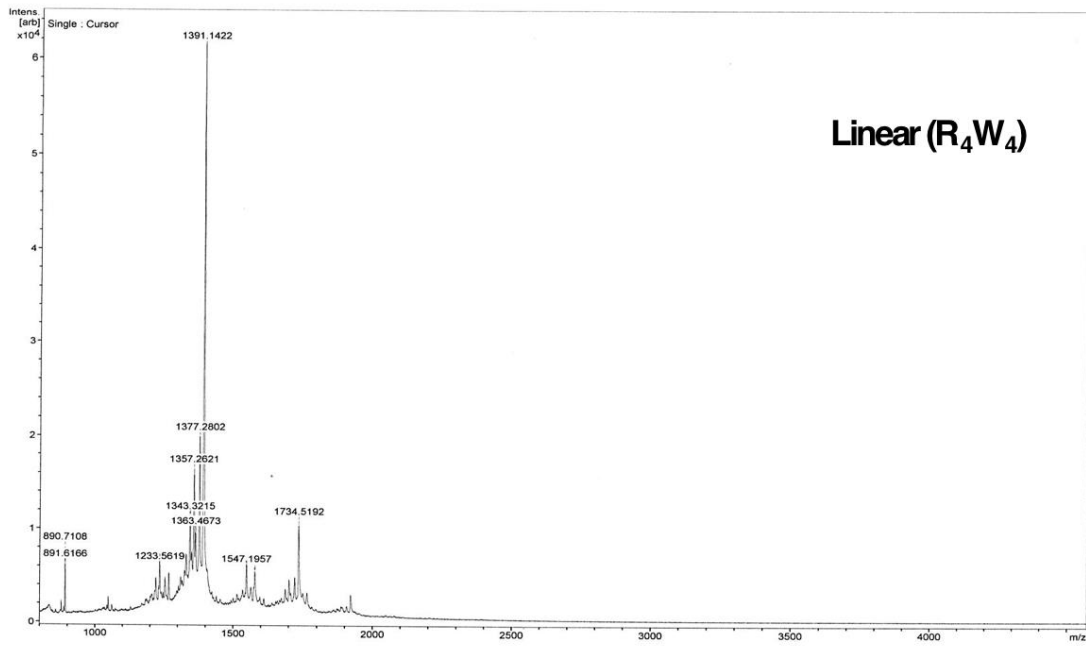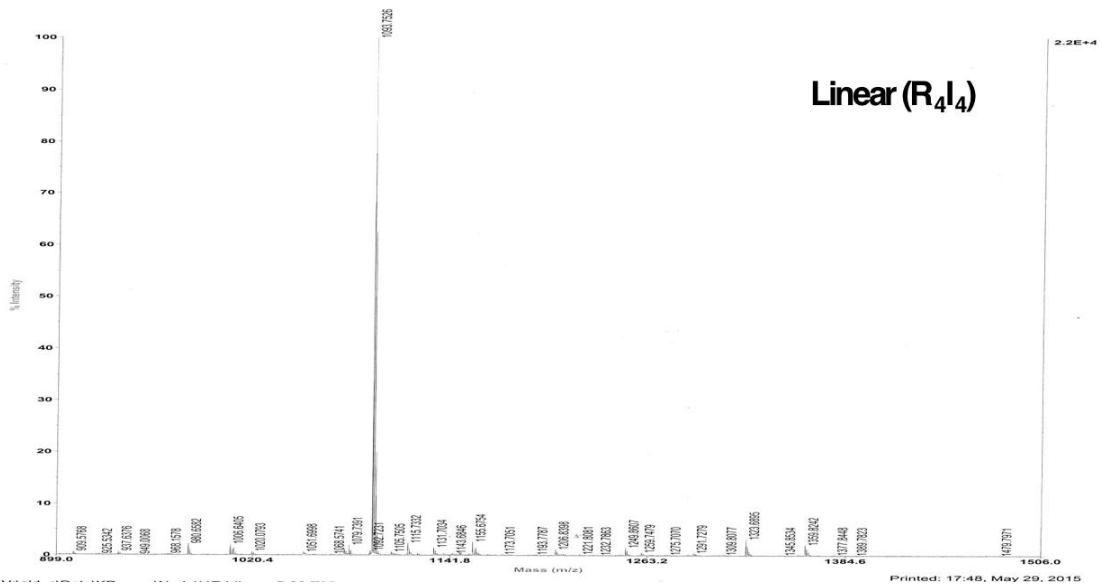

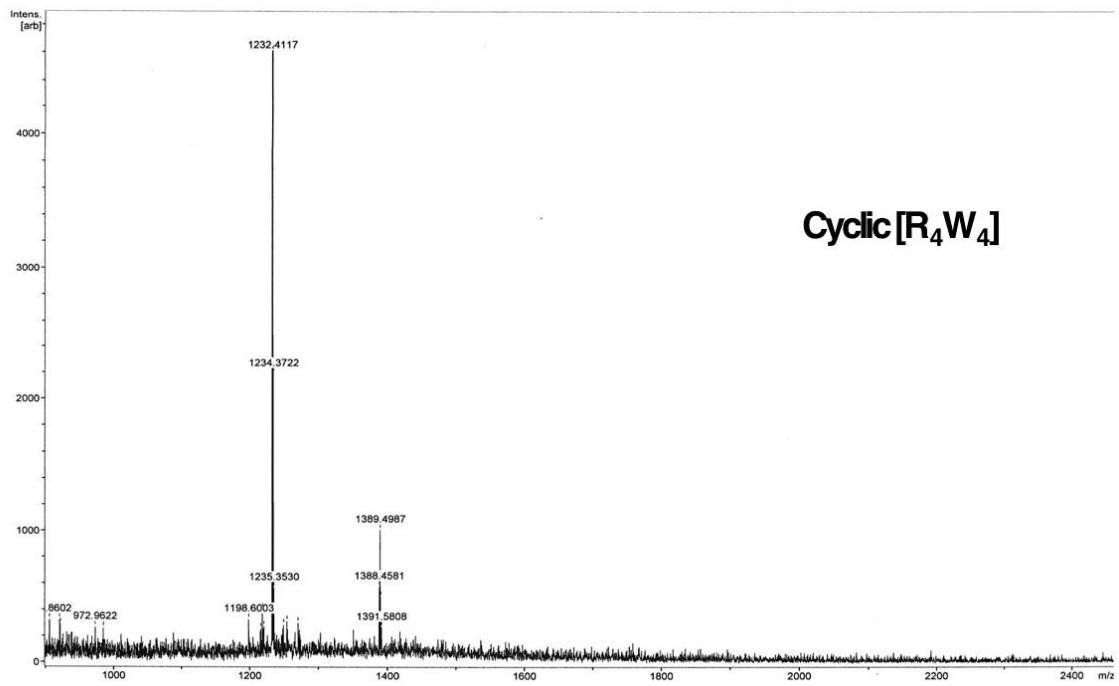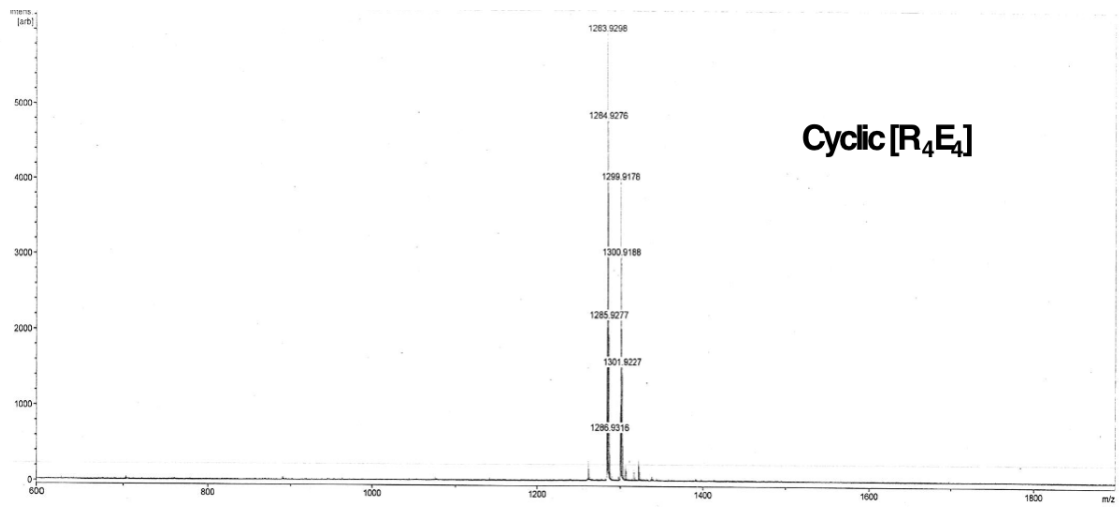

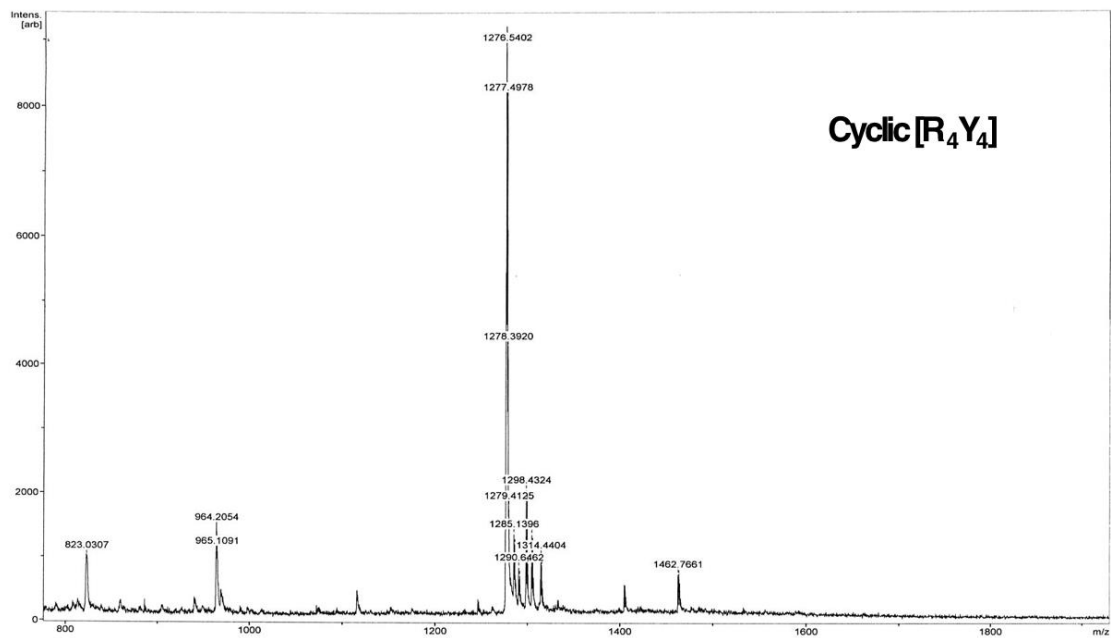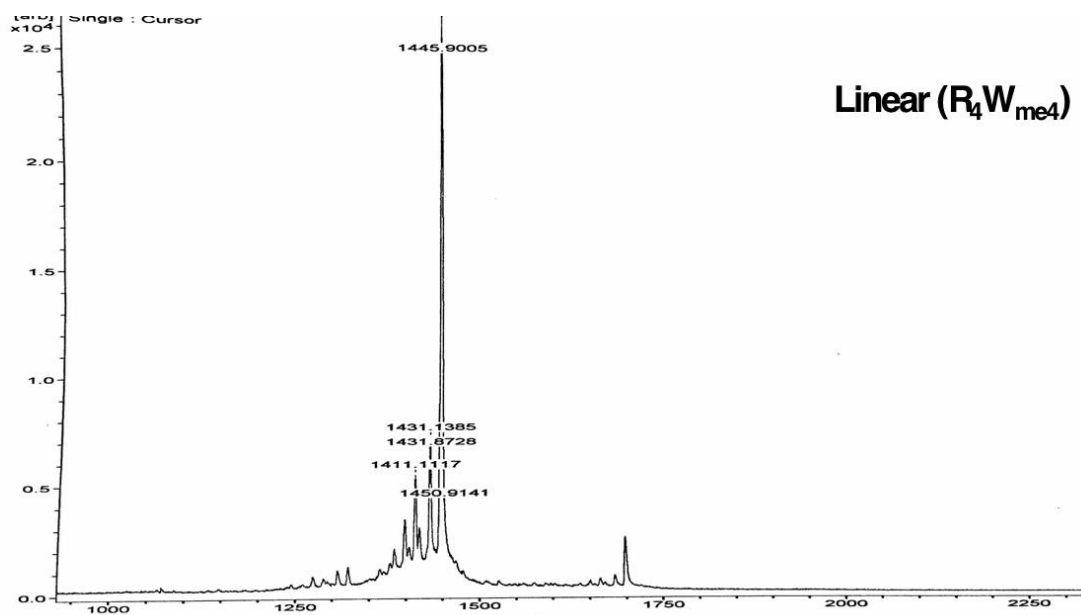

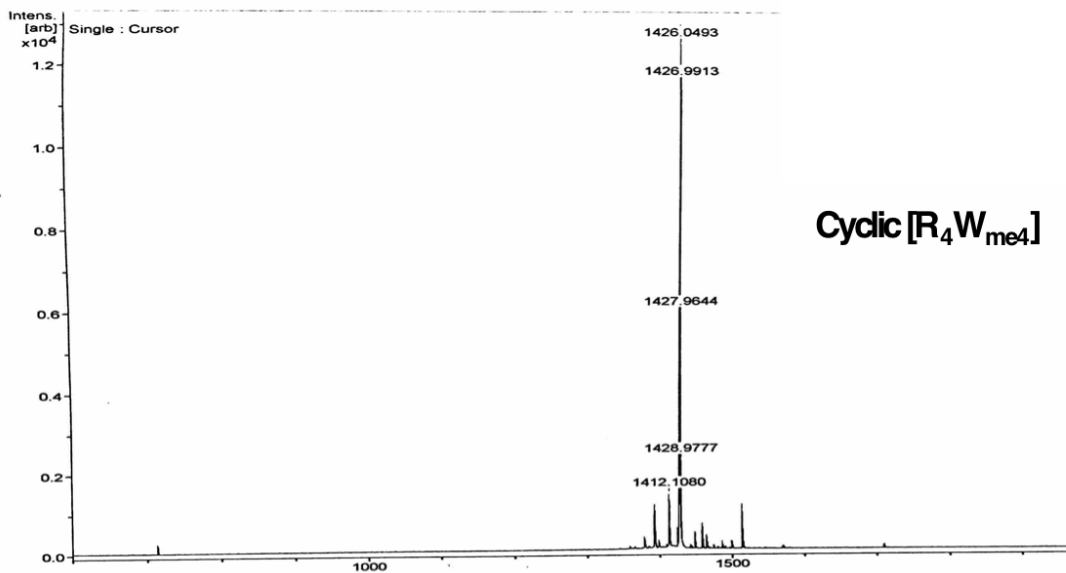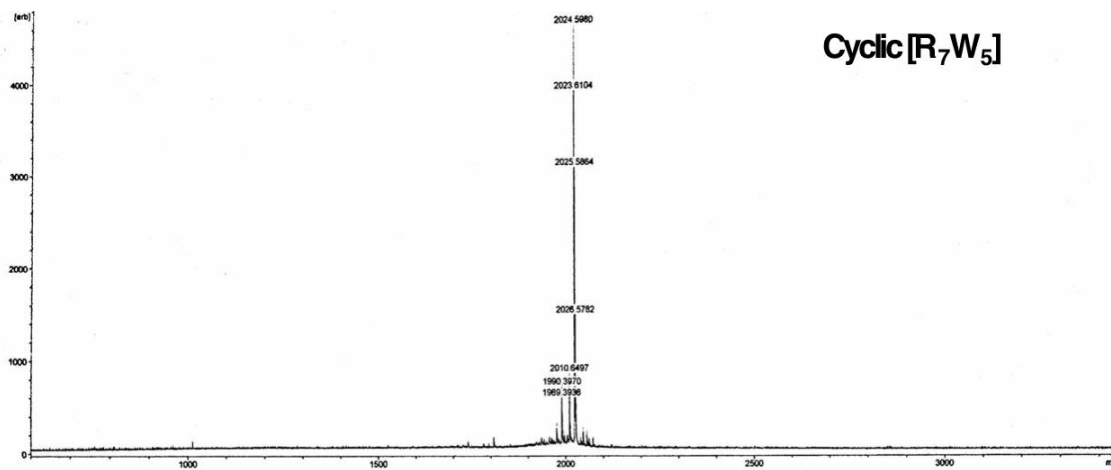

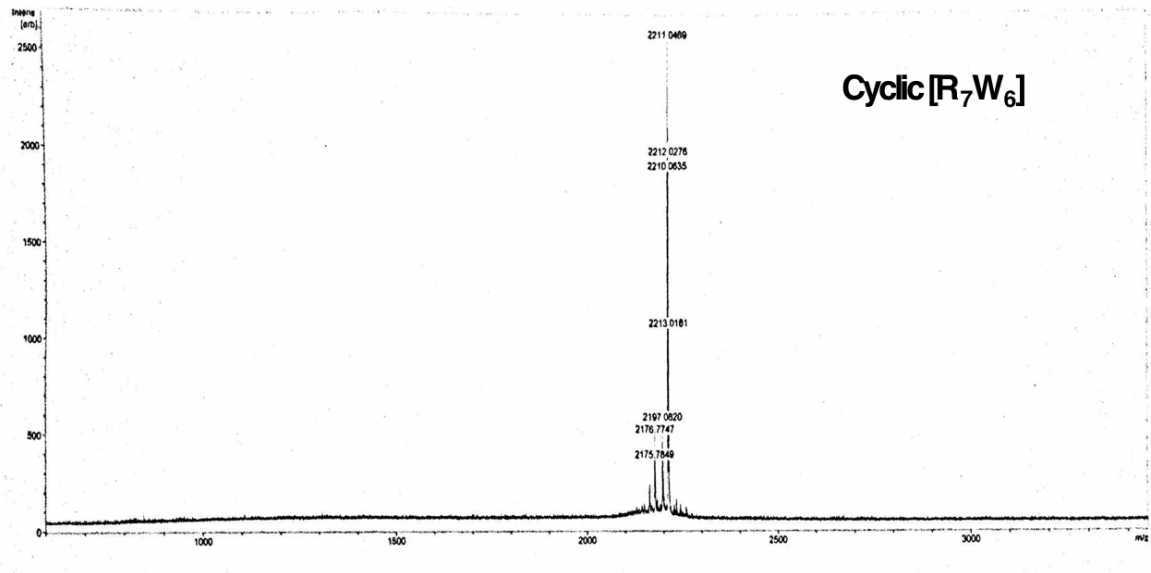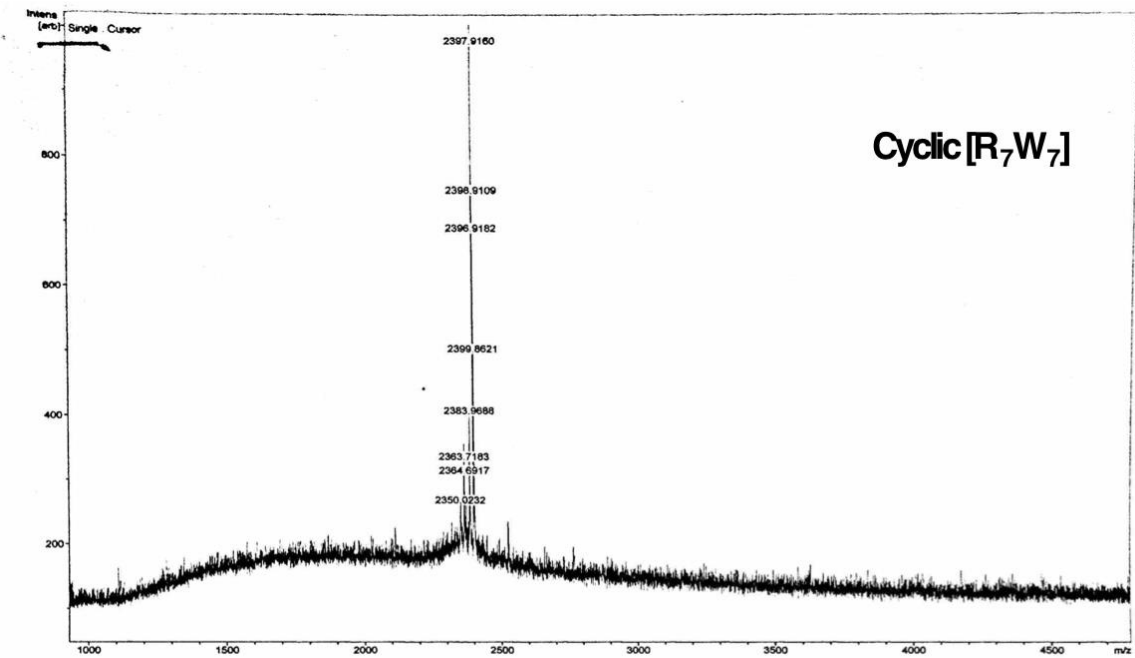

Supplement: molecules-23-02722-s001.pdf [file molecules-23-02722-s001.pdf]
